# Supplementary material for: Prognostic Risk Signature and Comprehensive Analyses of Endoplasmic Reticulum Stress-Related Genes in Lung Adenocarcinoma
Source: Hindawi journal article supplement (doi:10.1155/2022/6567916), 2022-05-04

A

|        | pvalue | Hazard ratio       |
|--------|--------|--------------------|
| ADRB2  | 0.001  | 0.673(0.530–0.856) |
| AGER   | 0.001  | 0.874(0.804–0.949) |
| CDK1   | <0.001 | 1.286(1.116–1.481) |
| CDKN3  | <0.001 | 1.327(1.147–1.535) |
| DES    | 0.030  | 0.867(0.761–0.986) |
| DSG2   | <0.001 | 1.389(1.175–1.643) |
| GJB2   | <0.001 | 1.191(1.083–1.309) |
| LPL    | 0.022  | 0.885(0.797–0.982) |
| SFTPC  | 0.001  | 0.931(0.891–0.973) |
| SLC2A1 | <0.001 | 1.293(1.150–1.454) |
| SLC6A4 | 0.040  | 0.711(0.514–0.984) |
| SSR4   | 0.016  | 0.776(0.630–0.954) |

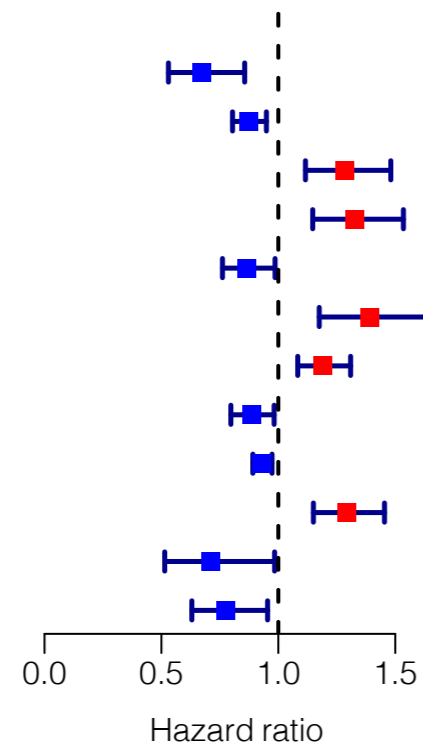

B

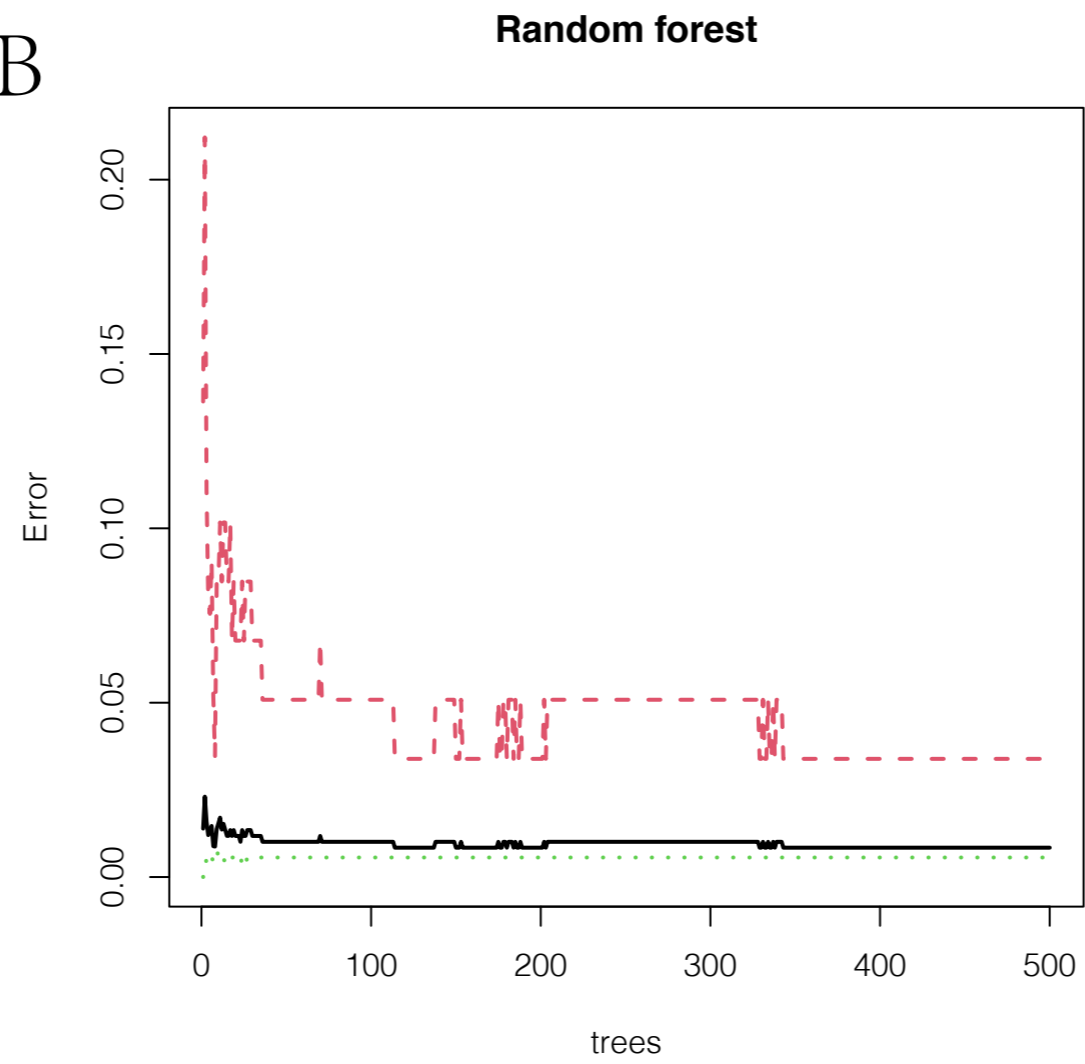

C

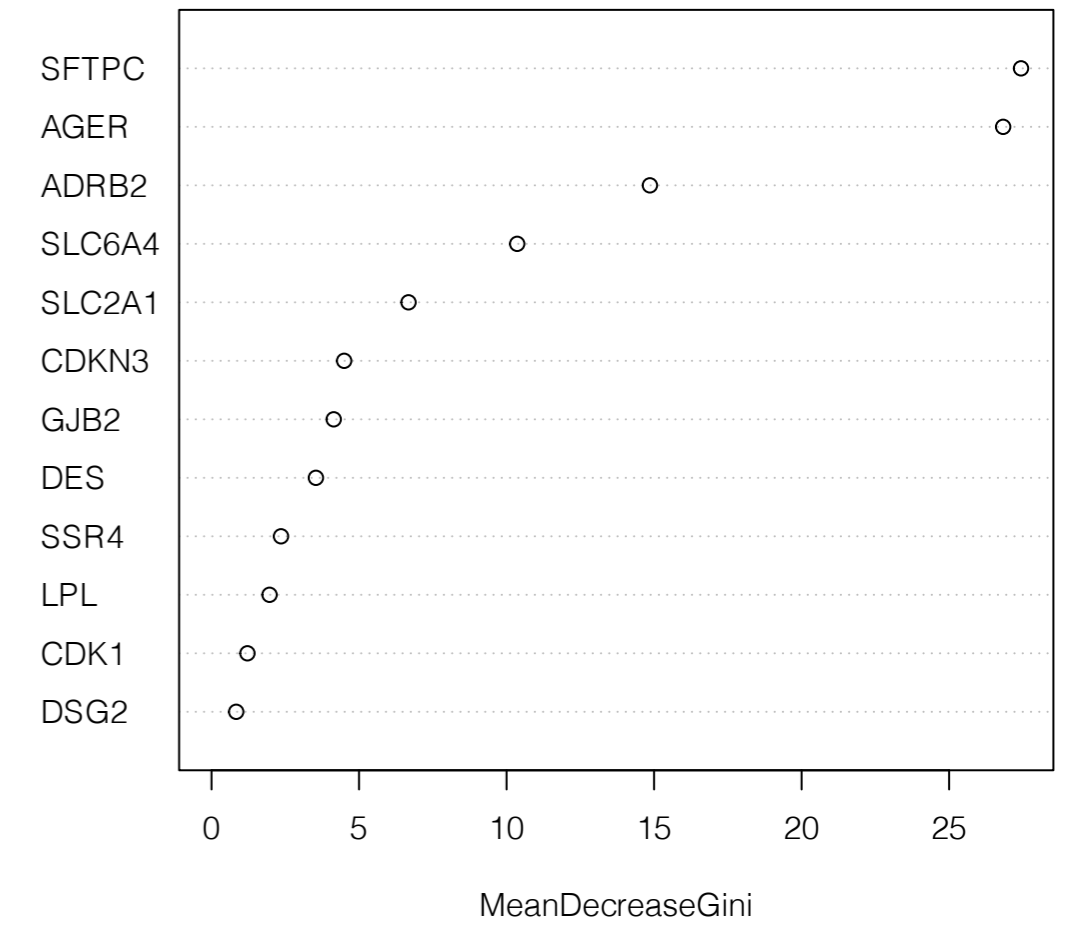

D

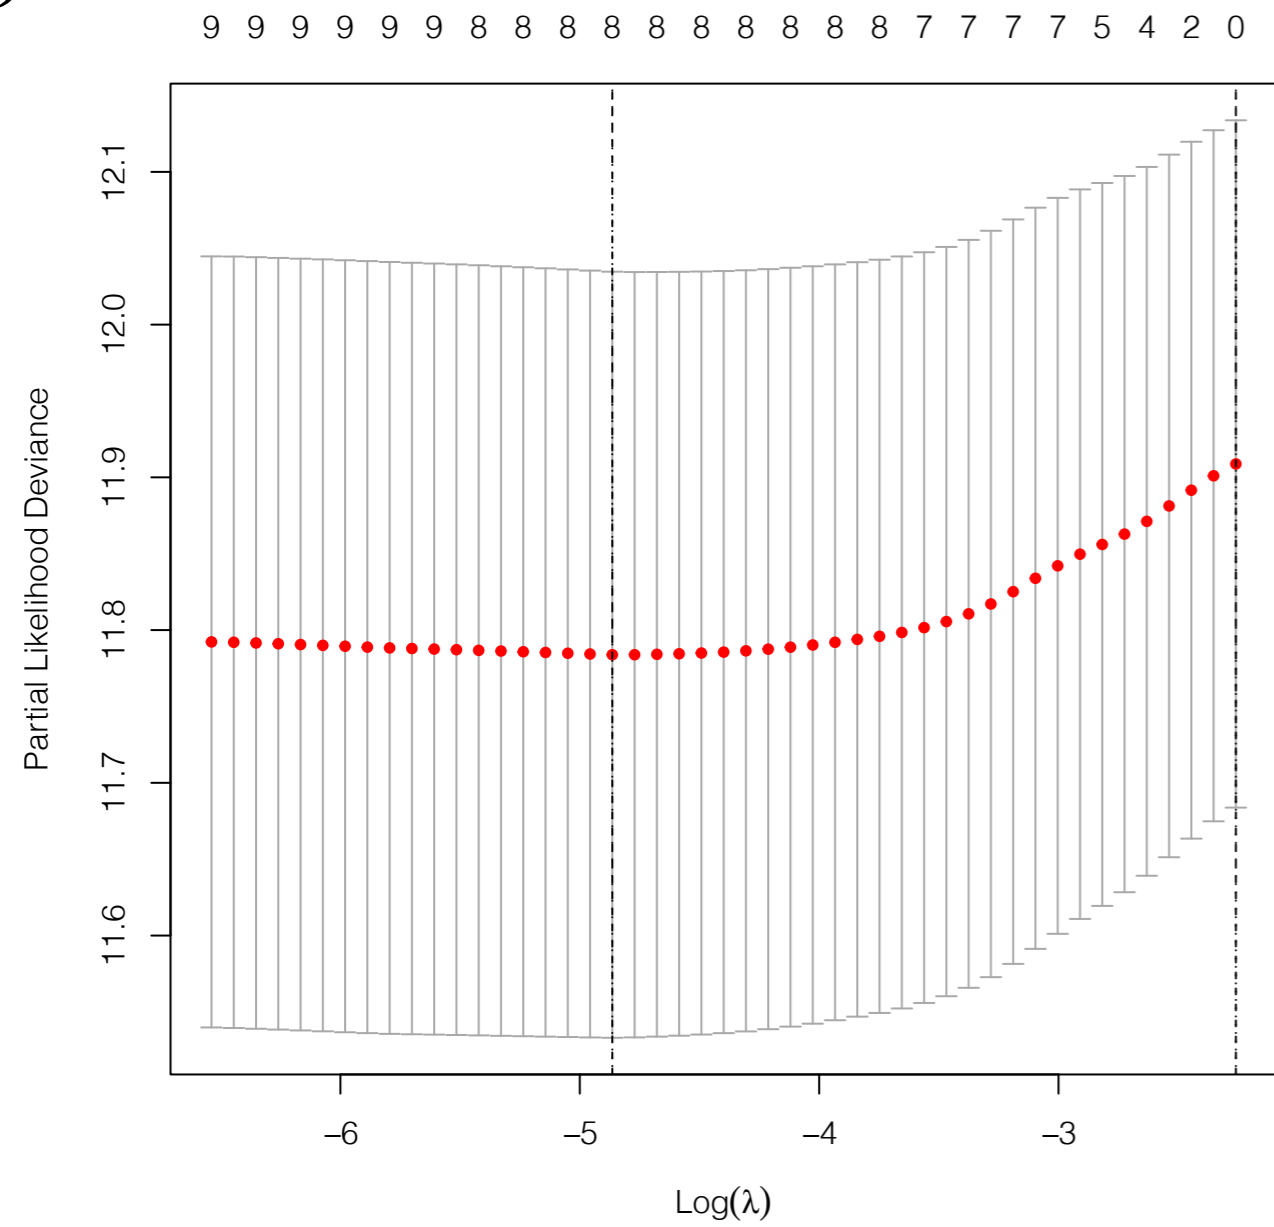

E

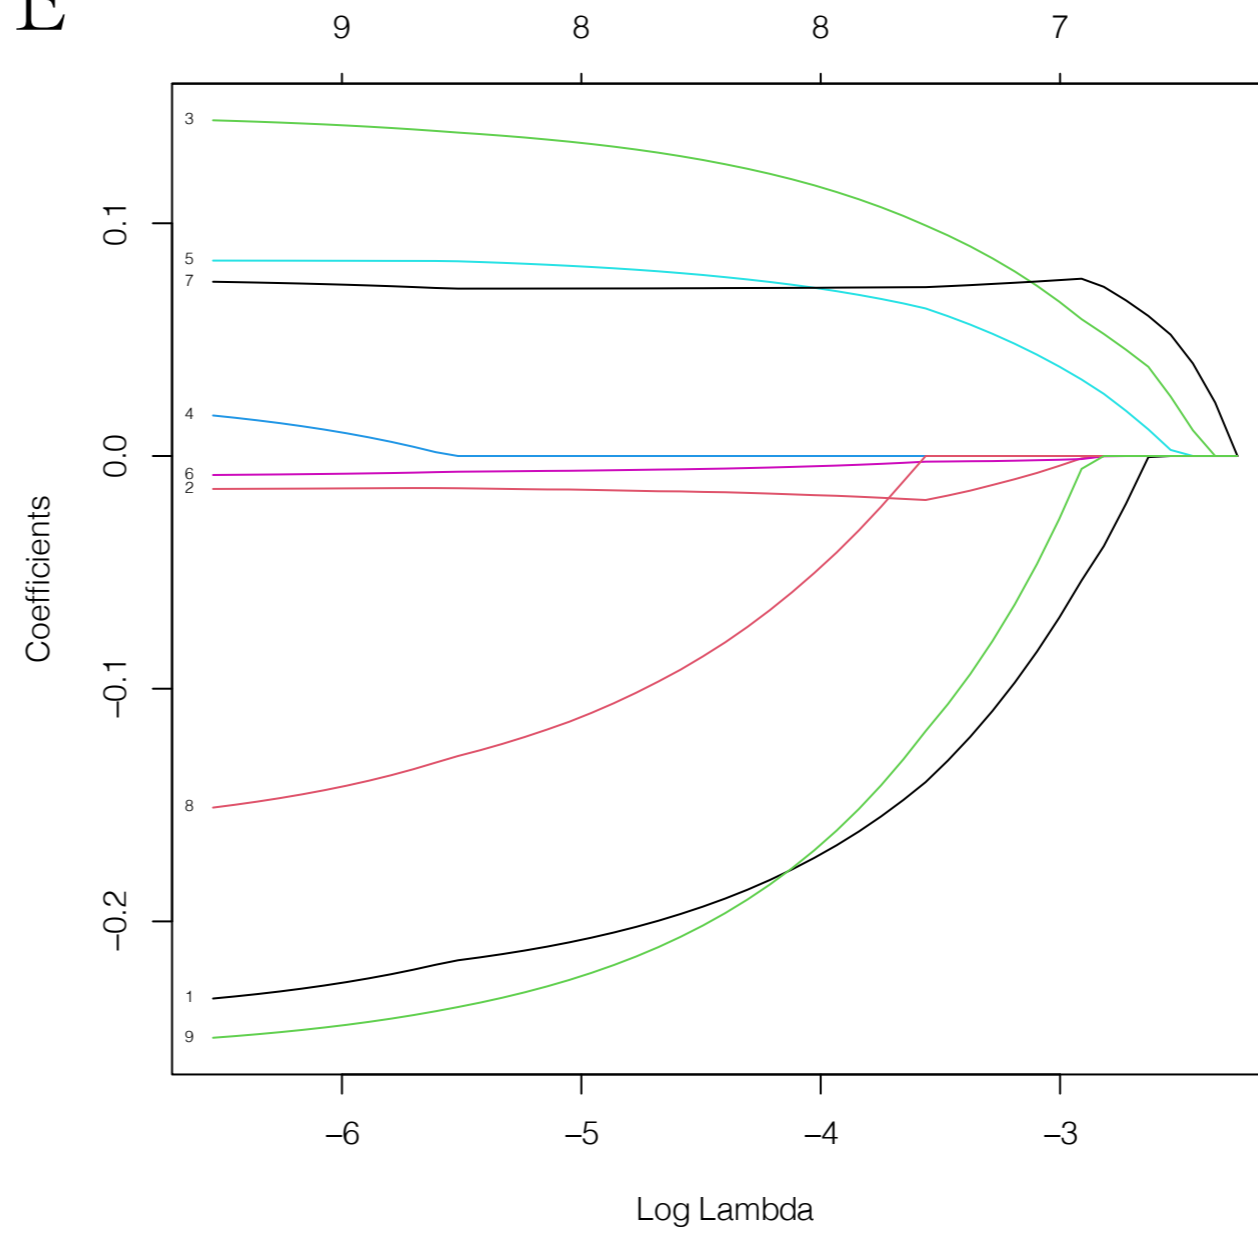

Supplement: f1 [file 6567916.f1.pdf]
