# Supplementary material for: Prognostic Risk Signature and Comprehensive Analyses of Endoplasmic Reticulum Stress-Related Genes in Lung Adenocarcinoma
Source: Hindawi journal article supplement (doi:10.1155/2022/6567916), 2022-05-04

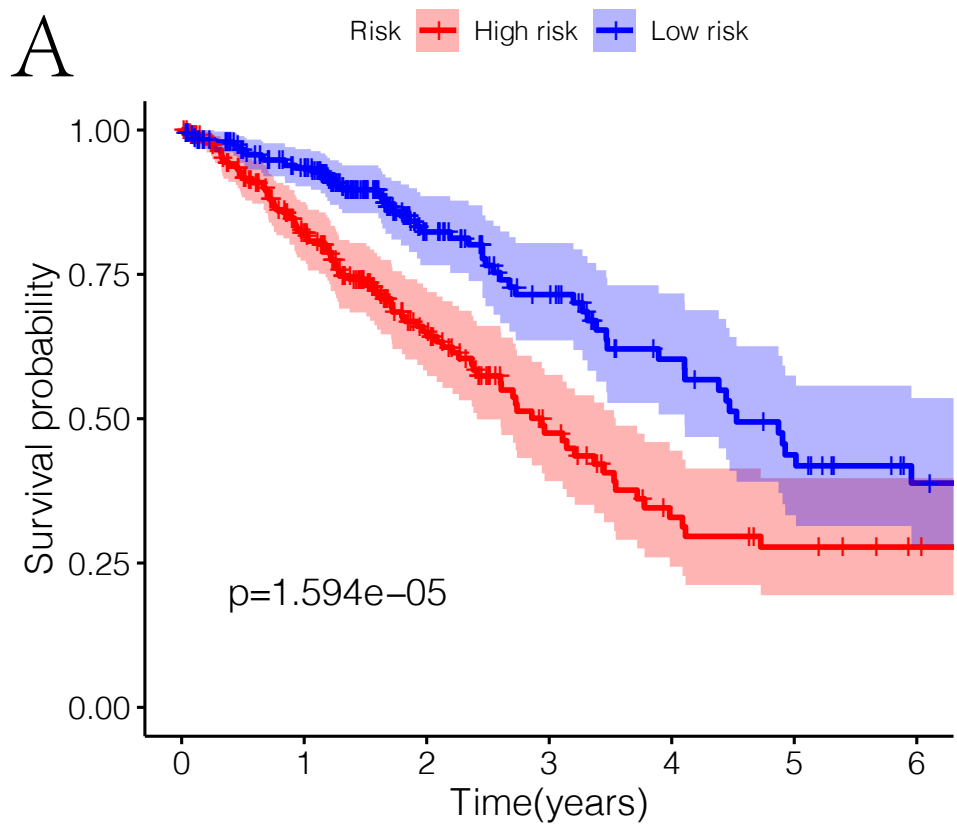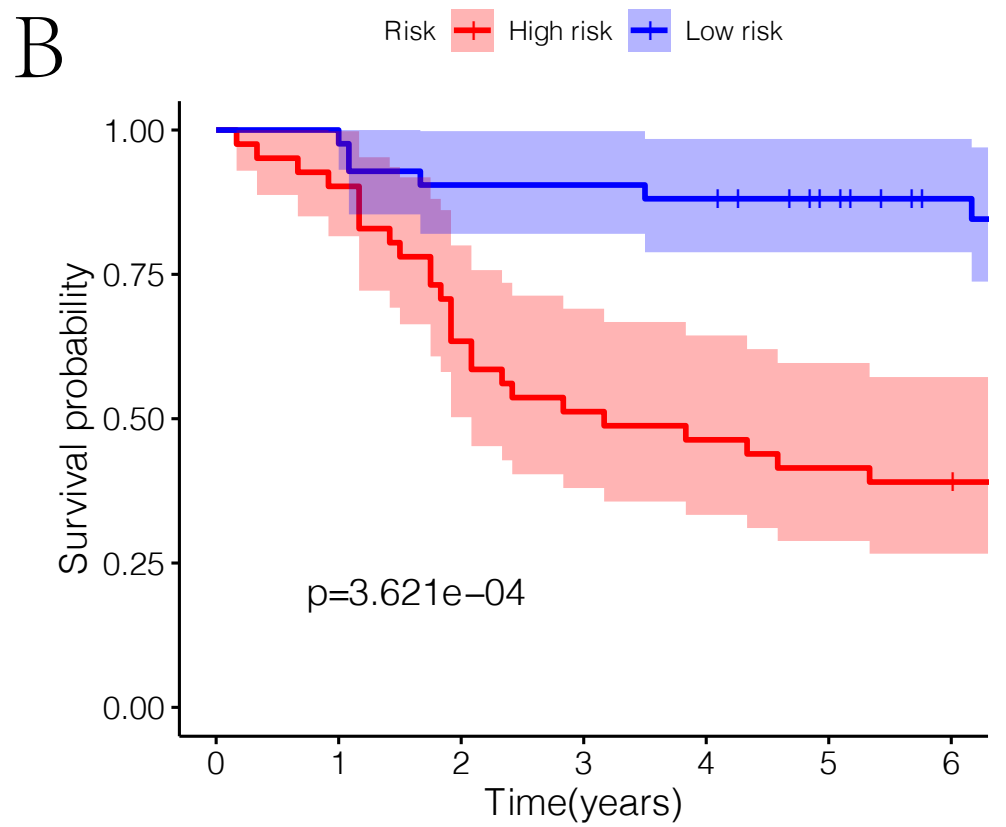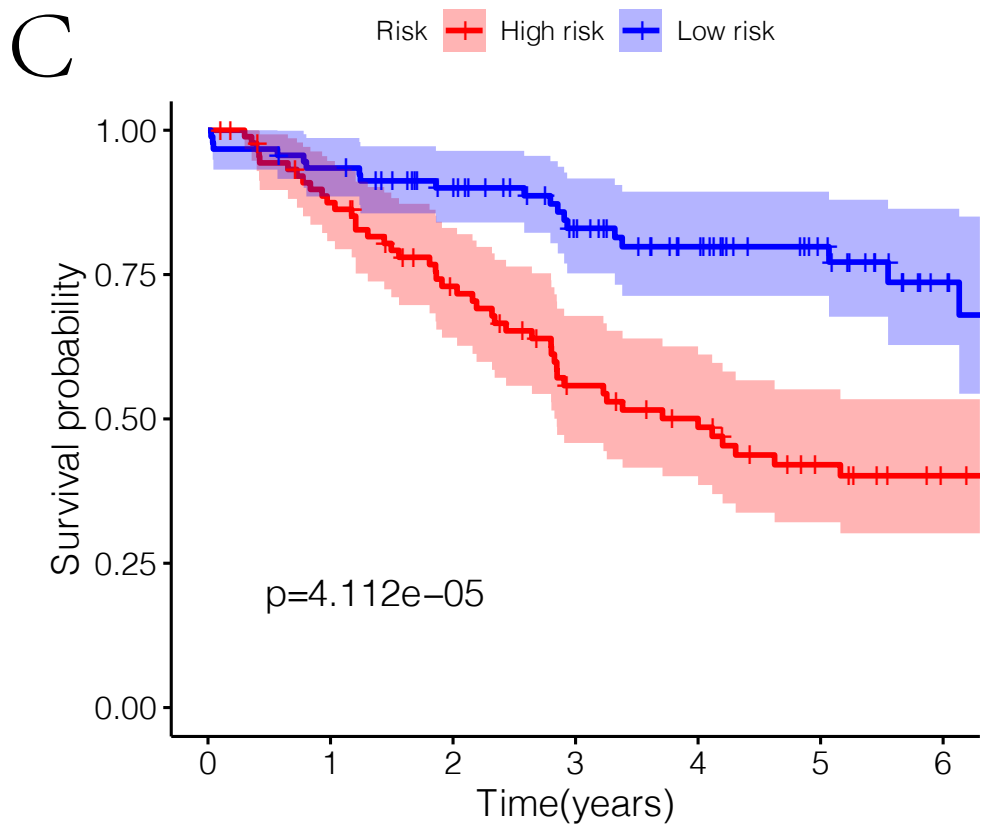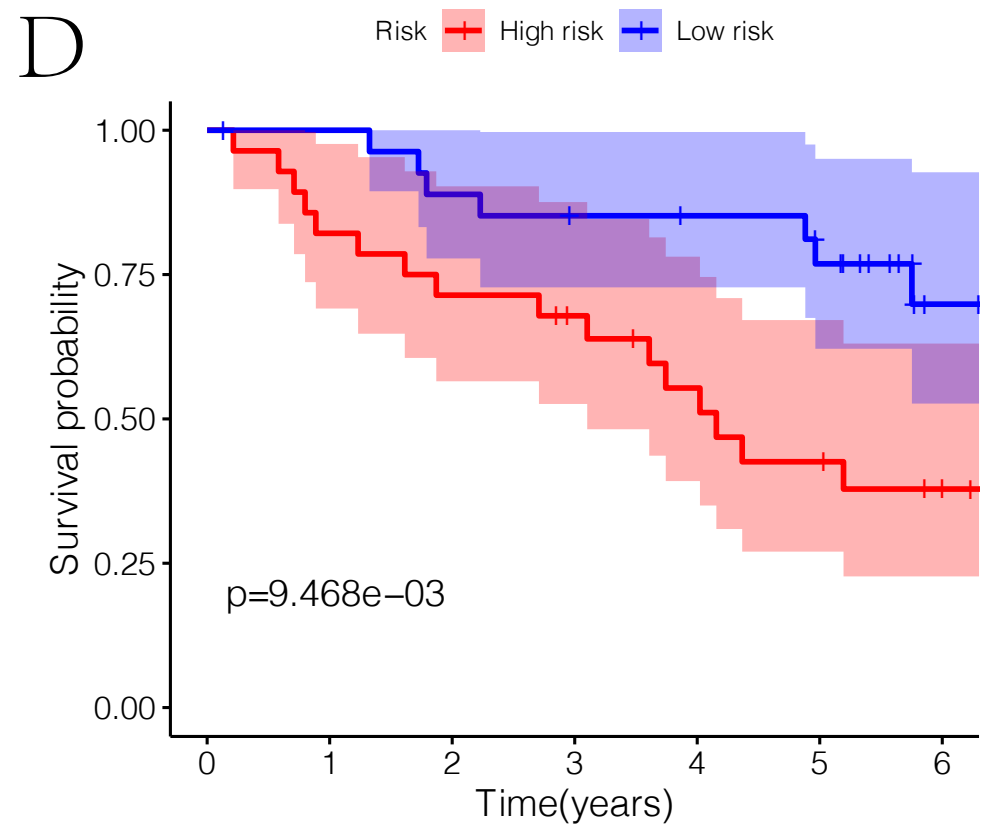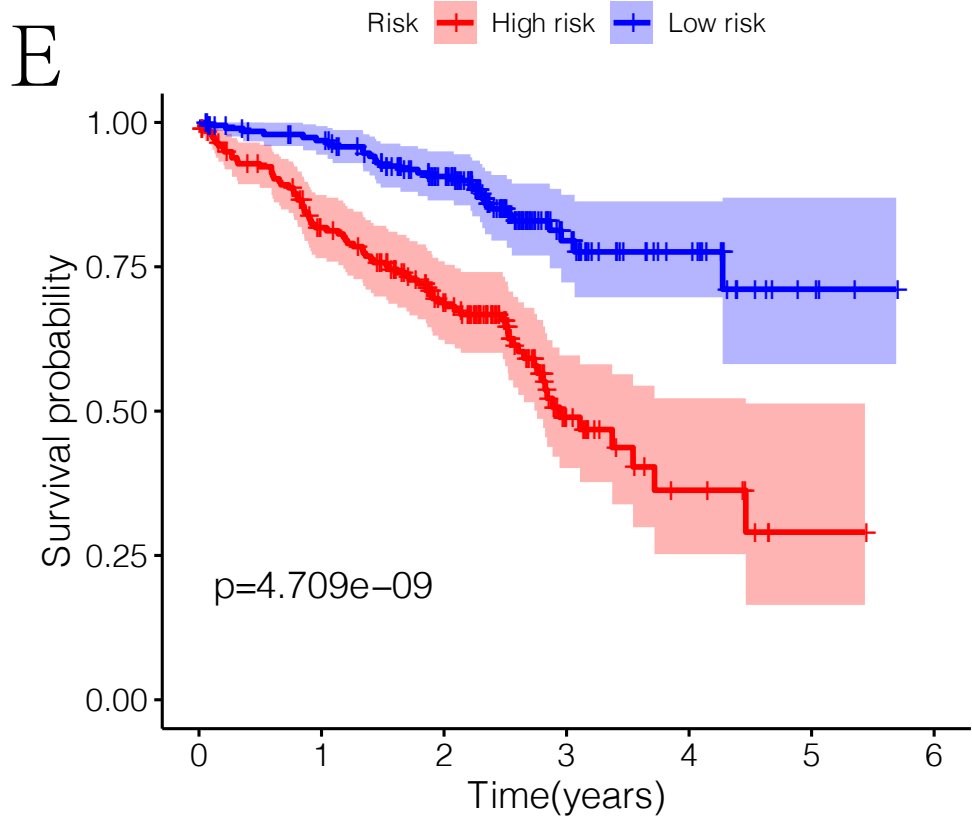

Supplement: f2 [file 6567916.f2.pdf]
