# Supplementary material for: Prognostic Risk Signature and Comprehensive Analyses of Endoplasmic Reticulum Stress-Related Genes in Lung Adenocarcinoma
Source: Hindawi journal article supplement (doi:10.1155/2022/6567916), 2022-05-04

A

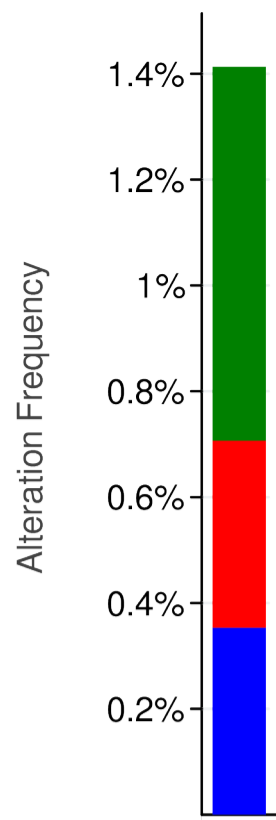

Structural variant data **+**  
Mutation data **+**  
CNA data **+**

Lung Adenocarcinoma

B

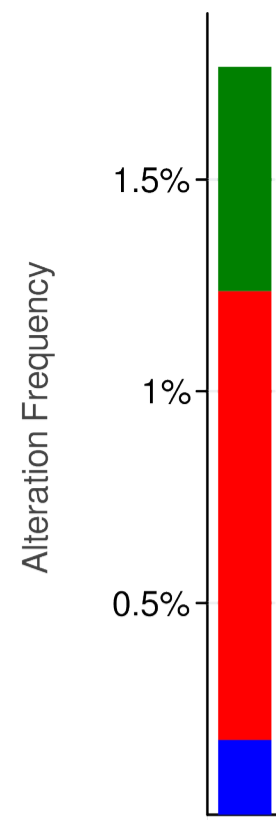

Structural variant data **+**  
Mutation data **+**  
CNA data **+**

Lung Adenocarcinoma

C

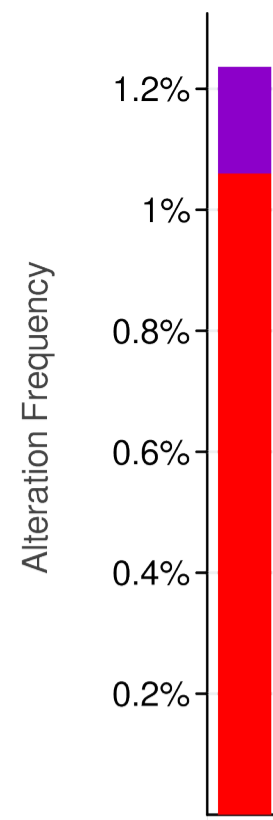

Structural variant data **+**  
Mutation data **+**  
CNA data **+**

Lung Adenocarcinoma

D

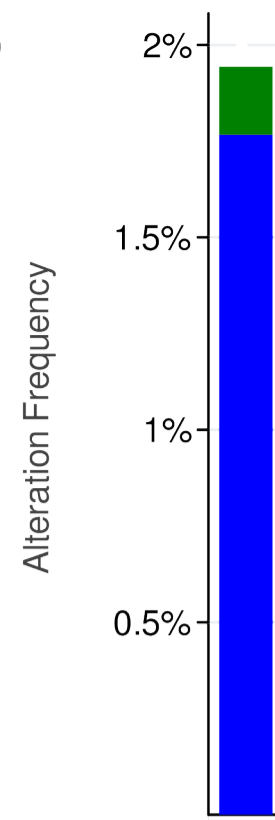

Structural variant data **+**  
Mutation data **+**  
CNA data **+**

Lung Adenocarcinoma

E

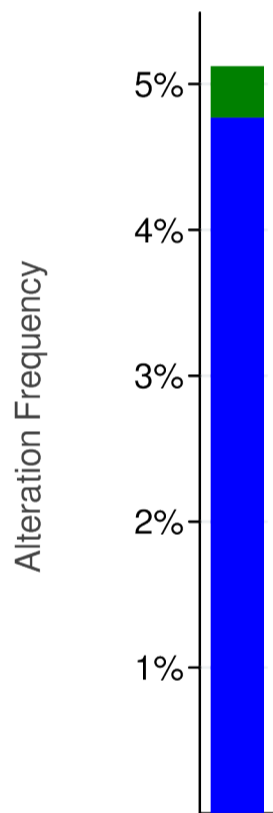

Structural variant data **+**  
Mutation data **+**  
CNA data **+**

Lung Adenocarcinoma

F

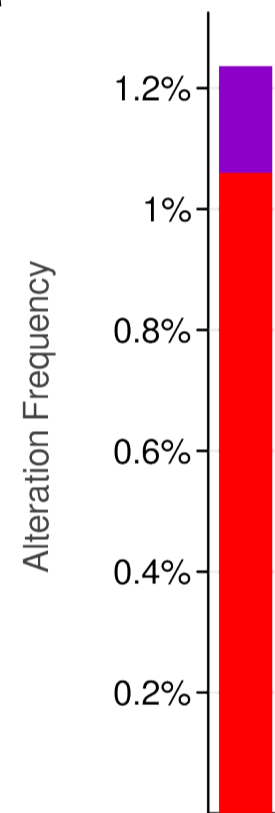

Structural variant data **+**  
Mutation data **+**  
CNA data **+**

Lung Adenocarcinoma

G

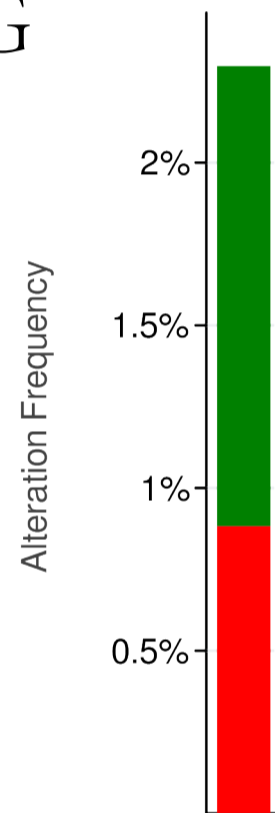

Structural variant data **+**  
Mutation data **+**  
CNA data **+**

Lung Adenocarcinoma

H

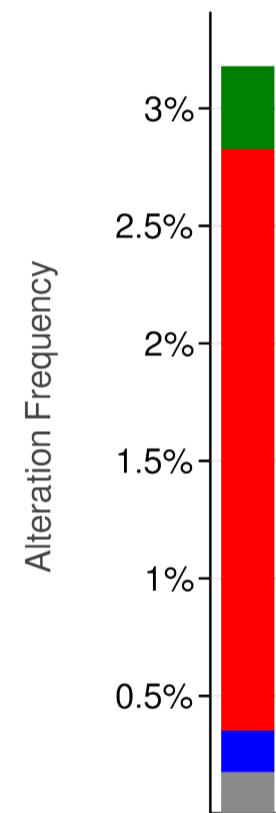

Structural variant data **+**  
Mutation data **+**  
CNA data **+**

Lung Adenocarcinoma

I

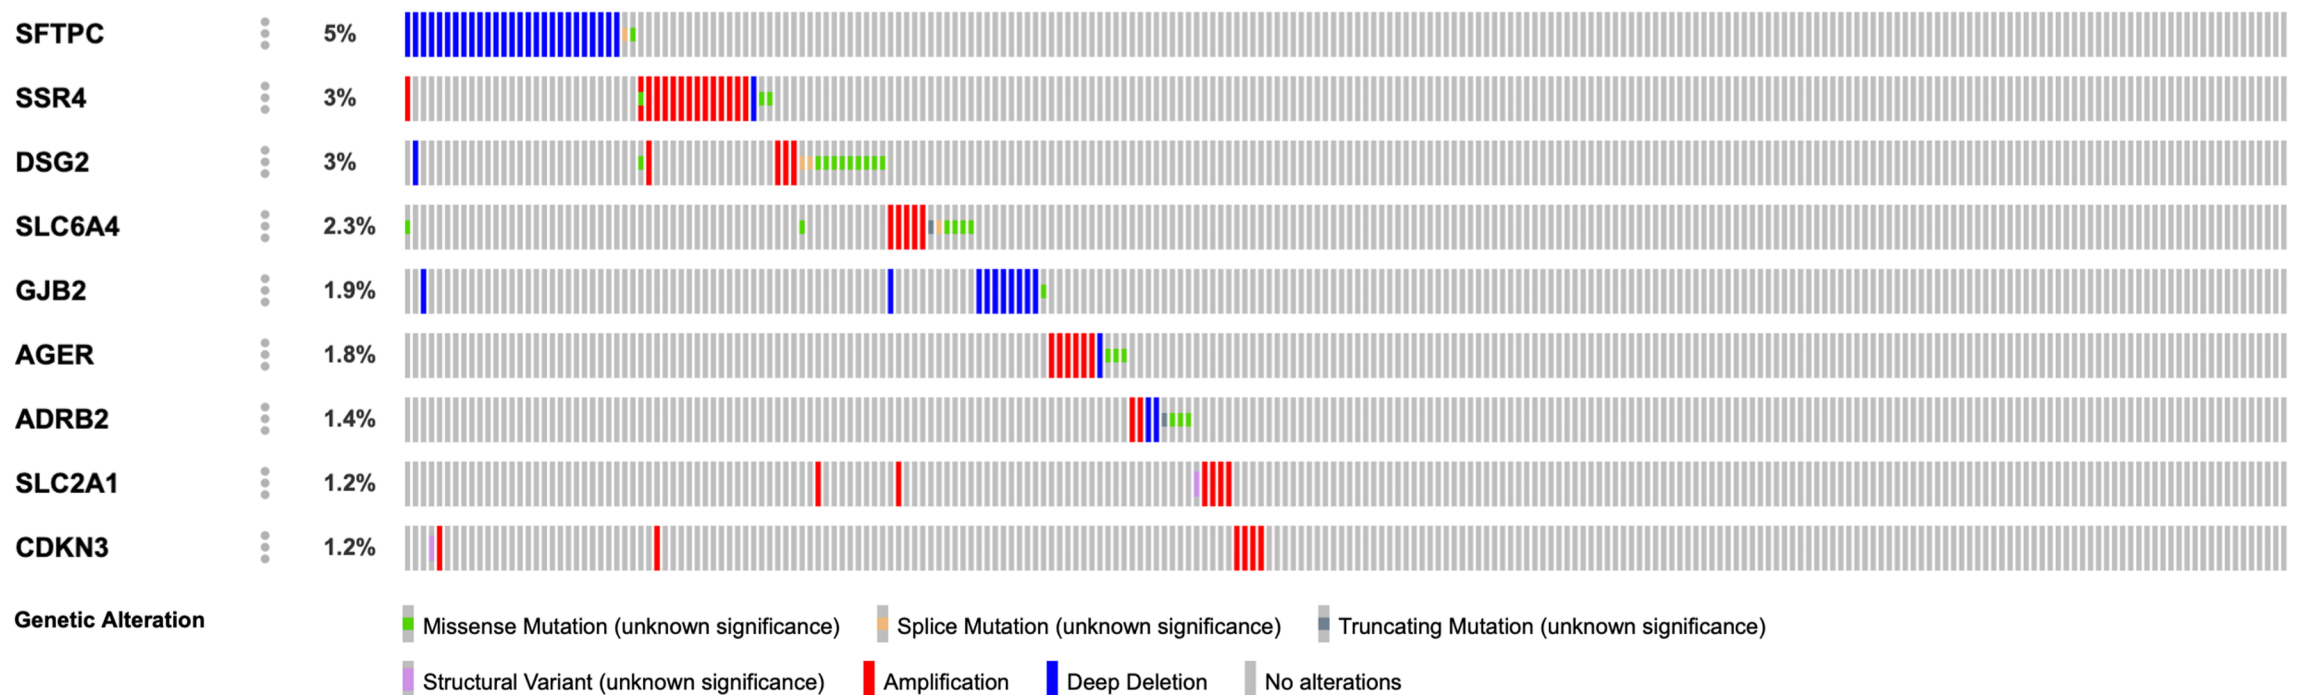

Supplement: f4 [file 6567916.f4.pdf]
